# Supplementary material for: The decomposition of benzenesulfonyl azide: a matrix isolation and computational study
Source: Royal Society of Chemistry journal article supplement (doi:10.1039/c6cp08125h), 2017-01-01
Supplement: c6cp08125h1.pdf [file c6cp08125h1.pdf]

**Electronic Supplementary Information (ESI) for**  
**The decomposition of benzenesulfonyl azide: A matrix isolation and**  
**computational study**

Guohai Deng,<sup>a</sup> Xuelin Dong,<sup>a</sup> Qifan Liu,<sup>a</sup> Dingqing Li,<sup>a</sup> Hongmin Li,<sup>a</sup> Qiao Sun,<sup>b</sup> and  
Xiaoqing Zeng<sup>a\*</sup>

<sup>a</sup> College of Chemistry, Chemical Engineering and Materials Science, Soochow  
University, 215123 Suzhou, P. R. China

<sup>b</sup> School for Radiological and Interdisciplinary Sciences, Soochow University, 215123  
Suzhou, P. R. China

\* Corresponding author: [xqzeng@suda.edu.cn](mailto:xqzeng@suda.edu.cn)

**Table S1.** Calculated harmonic IR frequencies (unscaled,  $\text{cm}^{-1}$ ) for  $\text{PhS(O)}_2\text{N}_3$  with different theoretical methods.

| B3LYP <sup>a</sup> | M06-2X <sup>a</sup> | MPW1PW91 <sup>a</sup> | CBS-QB3    |
|--------------------|---------------------|-----------------------|------------|
| 3215 (5)           | 3209 (6)            | 3236 (6)              | 3211 (5)   |
| 3214 (<1)          | 3205 (<1)           | 3235 (<1)             | 3210 (<1)  |
| 3199 (6)           | 3198 (<1)           | 3223 (4)              | 3195 (9)   |
| 3190 (7)           | 3192 (4)            | 3214 (6)              | 3186 (9)   |
| 3178 (<1)          | 3181 (<1)           | 3201 (<1)             | 3174 (<1)  |
| 2251 (554)         | 2348 (515)          | 2313 (552)            | 2248 (532) |
| 1622 (2)           | 1661 (2)            | 1649 (3)              | 1627 (<1)  |
| 1621 (<1)          | 1658 (<1)           | 1647 (<1)             | 1626 (2)   |
| 1511 (4)           | 1519 (3)            | 1517 (3)              | 1509 (4)   |
| 1479 (21)          | 1488 (29)           | 1486 (27)             | 1479 (22)  |
| 1404 (152)         | 1450 (164)          | 1442 (152)            | 1381 (130) |
| 1351 (12)          | 1342 (9)            | 1366 (9)              | 1347 (21)  |
| 1330 (2)           | 1326 (<1)           | 1341 (3)              | 1332 (1)   |
| 1269 (244)         | 1279 (267)          | 1308 (253)            | 1261 (224) |
| 1204 (4)           | 1231 (268)          | 1223 (227)            | 1202 (2)   |
| 1189 (143)         | 1200 (7)            | 1204 (10)             | 1187 (<1)  |
| 1188 (<1)          | 1177 (<1)           | 1187 (<1)             | 1163 (216) |
| 1104 (5)           | 1124 (36)           | 1116 (36)             | 1103 (6)   |
| 1094 (31)          | 1110 (5)            | 1110 (6)              | 1086 (33)  |
| 1041 (1)           | 1056 (1)            | 1052 (1)              | 1043 (3)   |
| 1024 (<1)          | 1038 (<1)           | 1026 (<1)             | 1019 (<1)  |
| 1006 (<1)          | 1016 (<1)           | 1009 (<1)             | 1015 (2)   |
| 1000 (2)           | 1005 (1)            | 998 (1)               | 995 (<1)   |
| 958 (<1)           | 967 (<1)            | 961 (<1)              | 951 (<1)   |
| 865 (<1)           | 874 (<1)            | 870 (<1)              | 860 (<1)   |
| 773 (15)           | 803 (121)           | 777 (19)              | 771 (17)   |
| 742 (122)          | 778 (25)            | 767 (132)             | 730 (104)  |
| 717 (11)           | 735 (44)            | 729 (26)              | 710 (13)   |
| 695 (32)           | 703 (39)            | 693 (37)              | 704 (33)   |
| 627 (<1)           | 635 (183)           | 624 (25)              | 628 (<1)   |
| 606 (259)          | 624 (36)            | 622 (199)             | 597 (280)  |
| 586 (8)            | 623 (7)             | 604 (12)              | 569 (10)   |
| 566 (86)           | 581 (93)            | 575 (86)              | 557 (86)   |
| 488 (9)            | 511 (4)             | 499 (4)               | 480 (15)   |
| 449 (2)            | 463 (2)             | 459 (2)               | 441 (2)    |
| 429 (<1)           | 449 (2)             | 442 (<1)              | 414 (2)    |
| 411 (<1)           | 409 (<1)            | 408 (<1)              | 412 (<1)   |
| 333 (<1)           | 342 (<1)            | 339 (<1)              | 324 (<1)   |
| 313 (1)            | 322 (2)             | 319 (1)               | 309 (<1)   |
| 268 (<1)           | 281 (<1)            | 274 (<1)              | 264 (1)    |

|          |          |          |          |
|----------|----------|----------|----------|
| 190 (<1) | 191 (<1) | 189 (<1) | 191 (<1) |
| 152 (<1) | 159 (<1) | 154 (<1) | 151 (<1) |
| 118 (<1) | 119 (<1) | 119 (<1) | 118 (<1) |
| 38 (<1)  | 38 (<1)  | 38 (<1)  | 40 (<1)  |
| 29 (<1)  | 30 (<1)  | 31 (<1)  | 29 (<1)  |

<sup>a</sup>The 6-311++G(3df,3pd) basis set was used. IR intensities (km mol<sup>-1</sup>) in parentheses.

**Table S2.** Calculated harmonic IR frequencies (unscaled, cm<sup>-1</sup>) for singlet and triplet PhS(O)<sub>2</sub>N with different theoretical methods.

| PhS(O) <sub>2</sub> N ( <sup>1</sup> A) |                     |                       |            | PhS(O) <sub>2</sub> N ( <sup>3</sup> A) |                     |                       |            |
|-----------------------------------------|---------------------|-----------------------|------------|-----------------------------------------|---------------------|-----------------------|------------|
| B3LYP <sup>a</sup>                      | M06-2X <sup>a</sup> | MPW1PW91 <sup>a</sup> | CBS-QB3    | B3LYP <sup>a</sup>                      | M06-2X <sup>a</sup> | MPW1PW91 <sup>a</sup> | CBS-QB3    |
| 3221 (3)                                | 3222 (6)            | 3242 (4)              | 3216 (3)   | 3215 (7)                                | 3220 (7)            | 3236 (8)              | 3210 (7)   |
| 3214 (3)                                | 3218 (2)            | 3235 (4)              | 3211 (3)   | 3214 (<1)                               | 3218 (<1)           | 3235 (<1)             | 3209 (<1)  |
| 3200 (5)                                | 3206 (<1)           | 3224 (3)              | 3196 (8)   | 3199 (5)                                | 3208 (<1)           | 3223 (3)              | 3195 (7)   |
| 3191 (7)                                | 3200 (5)            | 3215 (6)              | 3187 (9)   | 3191 (7)                                | 3203 (4)            | 3215 (6)              | 3187 (9)   |
| 3178 (<1)                               | 3185 (<1)           | 3202 (<1)             | 3175 (<1)  | 3178 (<1)                               | 3189 (<1)           | 3201 (<1)             | 3175 (<1)  |
| 1621 (4)                                | 1662 (2)            | 1648 (4)              | 1626 (2)   | 1618 (28)                               | 1658 (<1)           | 1644 (24)             | 1622 (26)  |
| 1620 (<1)                               | 1657 (3)            | 1646 (1)              | 1624 (3)   | 1611 (<1)                               | 1657 (15)           | 1639 (<1)             | 1617 (<1)  |
| 1509 (3)                                | 1520 (3)            | 1516 (3)              | 1506 (4)   | 1507 (<1)                               | 1519 (<1)           | 1513 (<1)             | 1504 (<1)  |
| 1480 (19)                               | 1492 (25)           | 1488 (22)             | 1480 (21)  | 1477 (18)                               | 1492 (21)           | 1484 (20)             | 1477 (20)  |
| 1374 (131)                              | 1440 (158)          | 1417 (145)            | 1352 (13)  | 1353 (2)                                | 1427 (169)          | 1389 (131)            | 1350 (2)   |
| 1349 (29)                               | 1345 (13)           | 1370 (17)             | 1338 (95)  | 1336 (148)                              | 1347 (14)           | 1368 (25)             | 1332 (<1)  |
| 1334 (5)                                | 1334 (2)            | 1341 (3)              | 1333 (49)  | 1331 (<1)                               | 1334 (<1)           | 1338 (5)              | 1310 (138) |
| 1204 (<1)                               | 1205 (<1)           | 1204 (<1)             | 1201 (<1)  | 1204 (<1)                               | 1230 (210)          | 1207 (62)             | 1201 (<1)  |
| 1189 (<1)                               | 1182 (1)            | 1188 (<1)             | 1187 (<1)  | 1189 (<1)                               | 1205 (18)           | 1197 (152)            | 1187 (<1)  |
| 1116 (129)                              | 1157 (159)          | 1144 (152)            | 1110 (101) | 1163 (206)                              | 1185 (<1)           | 1188 (<1)             | 1140 (200) |
| 1105 (4)                                | 1112 (4)            | 1110 (5)              | 1103 (6)   | 1104 (4)                                | 1123 (28)           | 1114 (24)             | 1103 (5)   |
| 1048 (11)                               | 1085 (20)           | 1067 (22)             | 1047 (<1)  | 1090 (16)                               | 1114 (3)            | 1110 (5)              | 1079 (12)  |
| 1028 (32)                               | 1055 (5)            | 1049 (11)             | 1019 (3)   | 1040 (<1)                               | 1057 (<1)           | 1051 (<1)             | 1042 (3)   |
| 1024 (<1)                               | 1040 (<1)           | 1025 (<1)             | 1017 (<1)  | 1026 (<1)                               | 1043 (<1)           | 1027 (<1)             | 1021 (<1)  |
| 1007 (<1)                               | 1020 (<1)           | 1010 (<1)             | 994 (65)   | 1007 (<1)                               | 1024 (<1)           | 1011 (<1)             | 1014 (5)   |
| 989 (13)                                | 997 (12)            | 989 (18)              | 994 (6)    | 998 (3)                                 | 1005 (<1)           | 997 (1)               | 997 (<1)   |
| 962 (<1)                                | 994 (7)             | 986 (3)               | 949 (1)    | 963 (<1)                                | 977 (<1)            | 966 (<1)              | 956 (<1)   |
| 954 (15)                                | 973 (2)             | 964 (2)               | 918 (20)   | 864 (<1)                                | 882 (<1)            | 869 (<1)              | 860 (<1)   |
| 865 (<1)                                | 877 (<1)            | 869 (<1)              | 858 (<1)   | 777 (30)                                | 797 (12)            | 784 (19)              | 774 (33)   |
| 770 (49)                                | 777 (46)            | 770 (51)              | 765 (50)   | 734 (16)                                | 763 (60)            | 751 (34)              | 728 (16)   |
| 717 (15)                                | 733 (25)            | 727 (20)              | 715 (13)   | 697 (3)                                 | 721 (11)            | 714 (9)               | 699 (32)   |
| 687 (21)                                | 696 (26)            | 683 (21)              | 696 (27)   | 690 (30)                                | 703 (30)            | 689 (28)              | 677 (6)    |
| 626 (<1)                                | 623 (<1)            | 623 (<1)              | 628 (<1)   | 625 (<1)                                | 622 (<1)            | 622 (<1)              | 627 (<1)   |
| 549 (116)                               | 580 (105)           | 558 (112)             | 543 (118)  | 545 (81)                                | 561 (100)           | 553 (86)              | 536 (82)   |
| 513 (25)                                | 523 (40)            | 518 (28)              | 507 (23)   | 519 (36)                                | 534 (39)            | 526 (37)              | 514 (38)   |
| 448 (8)                                 | 502 (15)            | 470 (8)               | 428 (9)    | 434 (8)                                 | 444 (9)             | 438 (8)               | 428 (9)    |
| 411 (<1)                                | 416 (3)             | 410 (<1)              | 411 (<1)   | 412 (3)                                 | 425 (4)             | 418 (4)               | 410 (<1)   |

|          |          |          |          |          |          |          |          |
|----------|----------|----------|----------|----------|----------|----------|----------|
| 392 (4)  | 406 (1)  | 402 (3)  | 383 (4)  | 408 (<1) | 410 (<1) | 406 (<1) | 406 (3)  |
| 378 (<1) | 393 (1)  | 387 (1)  | 358 (2)  | 310 (<1) | 320 (1)  | 316 (<1) | 306 (<1) |
| 309 (2)  | 319 (3)  | 316 (3)  | 305 (3)  | 283 (3)  | 303 (3)  | 291 (3)  | 277 (3)  |
| 263 (1)  | 279 (1)  | 267 (1)  | 258 (1)  | 242 (<1) | 257 (1)  | 246 (1)  | 243 (1)  |
| 178 (1)  | 182 (2)  | 177 (2)  | 178 (2)  | 181 (1)  | 186 (<1) | 180 (1)  | 183 (1)  |
| 130 (<1) | 134 (<1) | 130 (<1) | 127 (<1) | 113 (<1) | 112 (<1) | 112 (<1) | 112 (<1) |
| 48 (<1)  | 59 (<1)  | 51 (<1)  | 44 (<1)  | 52 (<1)  | 50 (<1)  | 50 (<1)  | 53 (<1)  |

<sup>a</sup>The 6-311++G(3df,3pd) basis set was used. IR intensities (km mol<sup>-1</sup>) in parentheses.

**Table S3.** Calculated vertical transitions for PhS(O)<sub>2</sub>N<sub>3</sub>, PhS(O)<sub>2</sub>N(singlet), PhS(O)<sub>2</sub>N(triplet) and PhNSO<sub>2</sub> at the TD-B3LYP/6-311++G(3df,3pd) level.

| PhS(O) <sub>2</sub> N <sub>3</sub> |            | PhS(O) <sub>2</sub> N (singlet) |            | PhS(O) <sub>2</sub> N (triplet) |            | PhNSO <sub>2</sub> |            |
|------------------------------------|------------|---------------------------------|------------|---------------------------------|------------|--------------------|------------|
| 273 nm                             | f = 0.0167 | 513 nm                          | f = 0.0036 | 550 nm                          | f = 0.0007 | 306 nm             | f = 0.0001 |
| 248 nm                             | f = 0.0106 | 292 nm                          | f = 0.0376 | 466 nm                          | f = 0.0011 | 281 nm             | f = 0.3248 |
| 230 nm                             | f = 0.0428 | 280 nm                          | f = 0.0034 | 425 nm                          | f = 0.0540 | 275 nm             | f = 0.0067 |
| 226 nm                             | f = 0.0085 | 269 nm                          | f = 0.0437 | 395 nm                          | f = 0.0060 | 258 nm             | f = 0.0001 |
| 197 nm                             | f = 0.0319 | 246 nm                          | f = 0.0035 | 388 nm                          | f = 0.0002 | 249 nm             | f = 0.0004 |

**Table S4.** Calculated harmonic IR frequencies (unscaled, cm<sup>-1</sup>) for PhNSO<sub>2</sub> (c) with different theoretical methods.

| B3LYP <sup>a</sup> | M06-2X <sup>a</sup> | MPW1PW91 <sup>a</sup> | CBS-QB3    |
|--------------------|---------------------|-----------------------|------------|
| 3227 (1)           | 3237 (<1)           | 3247 (2)              | 3222 (1)   |
| 3206 (4)           | 3219 (4)            | 3229 (4)              | 3202 (6)   |
| 3196 (12)          | 3205 (4)            | 3220 (10)             | 3191 (17)  |
| 3184 (8)           | 3199 (3)            | 3208 (7)              | 3180 (11)  |
| 3173 (<1)          | 3185 (<1)           | 3197 (<1)             | 3170 (<1)  |
| 1631 (1)           | 1669 (9)            | 1657 (3)              | 1636 (1)   |
| 1615 (5)           | 1655 (4)            | 1641 (5)              | 1619 (5)   |
| 1520 (37)          | 1539 (74)           | 1531 (59)             | 1519 (39)  |
| 1483 (7)           | 1495 (13)           | 1491 (9)              | 1484 (8)   |
| 1376 (258)         | 1443 (288)          | 1418 (298)            | 1359 (12)  |
| 1362 (60)          | 1417 (288)          | 1399 (134)            | 1353 (196) |
| 1349 (88)          | 1355 (2)            | 1362 (24)             | 1324 (99)  |
| 1310 (65)          | 1312 (20)           | 1333 (32)             | 1305 (111) |
| 1209 (22)          | 1249 (57)           | 1229 (87)             | 1206 (14)  |
| 1189 (73)          | 1207 (1)            | 1203 (10)             | 1184 (7)   |
| 1185 (4)           | 1177 (<1)           | 1184 (<1)             | 1177 (97)  |
| 1108 (9)           | 1118 (8)            | 1114 (10)             | 1107 (11)  |
| 1054 (1)           | 1080 (2)            | 1066 (1)              | 1053 (1)   |
| 1013 (13)          | 1055 (8)            | 1038 (12)             | 1016 (2)   |
| 1012 (<1)          | 1029 (<1)           | 1011 (<1)             | 1008 (<1)  |
| 999 (<1)           | 1015 (<1)           | 1001 (<1)             | 994 (21)   |

|          |          |          |          |
|----------|----------|----------|----------|
| 993 (7)  | 1001 (3) | 991 (4)  | 989 (<1) |
| 943 (4)  | 954 (4)  | 944 (4)  | 938 (5)  |
| 858 (<1) | 872 (<1) | 861 (<1) | 853 (<1) |
| 775 (59) | 796 (31) | 778 (9)  | 778 (52) |
| 765 (8)  | 784 (37) | 776 (63) | 766 (8)  |
| 689 (18) | 702 (21) | 682 (16) | 704 (29) |
| 634 (<1) | 635 (3)  | 634 (2)  | 634 (<1) |
| 612 (8)  | 618 (4)  | 612 (7)  | 613 (9)  |
| 536 (39) | 555 (48) | 544 (42) | 526 (39) |
| 521 (6)  | 524 (4)  | 522 (6)  | 521 (7)  |
| 421 (<1) | 441 (31) | 420 (3)  | 421 (1)  |
| 368 (20) | 418 (<1) | 393 (20) | 370 (18) |
| 352 (1)  | 361 (1)  | 358 (1)  | 349 (2)  |
| 323 (7)  | 348 (5)  | 325 (7)  | 319 (8)  |
| 280 (<1) | 270 (2)  | 281 (<1) | 279 (<1) |
| 146 (2)  | 153 (1)  | 148 (2)  | 149 (2)  |
| 103 (<1) | 107 (<1) | 103 (<1) | 102 (<1) |
| 27 (<1)  | 35 (<1)  | 23 (<1)  | 20 (<1)  |

<sup>a</sup>The 6-311++G(3df,3pd) basis set was used. IR intensities (km mol<sup>-1</sup>) in parentheses.

Calculated absolute energies (in Hartrees), and the atomic coordinates (in Å) for all optimized structures.

**PhSO<sub>2</sub>N<sub>3</sub>**

**B3LYP/6-311++G(3df,3pd)**

|                                              |             |
|----------------------------------------------|-------------|
| Zero-point correction=                       | 0.114005    |
| Thermal correction to Energy=                | 0.124273    |
| Thermal correction to Enthalpy=              | 0.125217    |
| Thermal correction to Gibbs Free Energy=     | 0.076276    |
| Sum of electronic and zero-point Energies=   | -944.558782 |
| Sum of electronic and thermal Energies=      | -944.548514 |
| Sum of electronic and thermal Enthalpies=    | -944.547570 |
| Sum of electronic and thermal Free Energies= | -944.596511 |

|   |             |             |             |
|---|-------------|-------------|-------------|
| C | 2.45876900  | 1.24955000  | 0.71913600  |
| C | 1.14151600  | 0.84148800  | 0.88829200  |
| C | 0.67275700  | -0.23707400 | 0.14491200  |
| C | 1.49016900  | -0.91404400 | -0.75606300 |
| C | 2.80319900  | -0.49424400 | -0.91378800 |
| C | 3.28553400  | 0.58579600  | -0.18013800 |
| H | 2.83868700  | 2.08163200  | 1.29534100  |
| H | 0.49099500  | 1.33469800  | 1.59512900  |
| H | 1.10341800  | -1.75752100 | -1.30846000 |
| H | 3.45121600  | -1.01353600 | -1.60601100 |
| H | 4.31059800  | 0.90645000  | -0.30629700 |
| S | -1.00751800 | -0.76379600 | 0.34483000  |
| O | -1.10668800 | -2.15433200 | 0.03990000  |
| O | -1.53491600 | -0.20049800 | 1.55389400  |
| N | -1.80162800 | -0.00910000 | -0.99296400 |
| N | -2.19143800 | 1.14653100  | -0.78836500 |
| N | -2.58599900 | 2.19382900  | -0.69744900 |

**M06-2X**

|                                              |             |
|----------------------------------------------|-------------|
| Zero-point correction=                       | 0.115394    |
| Thermal correction to Energy=                | 0.125470    |
| Thermal correction to Enthalpy=              | 0.126415    |
| Thermal correction to Gibbs Free Energy=     | 0.077887    |
| Sum of electronic and zero-point Energies=   | -944.308354 |
| Sum of electronic and thermal Energies=      | -944.298278 |
| Sum of electronic and thermal Enthalpies=    | -944.297334 |
| Sum of electronic and thermal Free Energies= | -944.345861 |

|   |            |            |            |
|---|------------|------------|------------|
| C | 2.40424600 | 1.21909900 | 0.71540600 |
| C | 1.08290900 | 0.82693800 | 0.87424400 |

|   |             |             |             |
|---|-------------|-------------|-------------|
| C | 0.62498300  | -0.27009200 | 0.15872100  |
| C | 1.44664300  | -0.98349300 | -0.70315900 |
| C | 2.76418400  | -0.58147500 | -0.84845300 |
| C | 3.23920100  | 0.51828600  | -0.14351800 |
| H | 2.78110200  | 2.06736300  | 1.26849400  |
| H | 0.41899900  | 1.34370600  | 1.55253600  |
| H | 1.05460500  | -1.84023400 | -1.23248600 |
| H | 3.42163200  | -1.12887500 | -1.50843600 |
| H | 4.26858800  | 0.82645200  | -0.26075000 |
| S | -1.06143700 | -0.75332600 | 0.32043900  |
| O | -1.19230600 | -2.13440500 | 0.02062400  |
| O | -1.59005400 | -0.17190000 | 1.51169000  |
| N | -1.79207400 | 0.01903600  | -1.01079100 |
| N | -2.00151600 | 1.22415800  | -0.80458600 |
| N | -2.21727300 | 2.30818700  | -0.68810100 |

### MPW1PW91

|                                              |             |
|----------------------------------------------|-------------|
| Zero-point correction=                       | 0.115270    |
| Thermal correction to Energy=                | 0.125433    |
| Thermal correction to Enthalpy=              | 0.126377    |
| Thermal correction to Gibbs Free Energy=     | 0.077694    |
| Sum of electronic and zero-point Energies=   | -944.420255 |
| Sum of electronic and thermal Energies=      | -944.410092 |
| Sum of electronic and thermal Enthalpies=    | -944.409147 |
| Sum of electronic and thermal Free Energies= | -944.457831 |

|   |             |             |             |
|---|-------------|-------------|-------------|
| C | 2.43507900  | 1.22957100  | 0.72596600  |
| C | 1.11968200  | 0.82703000  | 0.89132100  |
| C | 0.65146600  | -0.24684200 | 0.14809300  |
| C | 1.46573500  | -0.92594300 | -0.74807800 |
| C | 2.77713400  | -0.51229000 | -0.90153400 |
| C | 3.25909800  | 0.56383200  | -0.16870100 |
| H | 2.81716800  | 2.06029000  | 1.30276500  |
| H | 0.46623000  | 1.31989400  | 1.59640600  |
| H | 1.07415100  | -1.76830000 | -1.29956700 |
| H | 3.42607000  | -1.03413100 | -1.59102900 |
| H | 4.28573500  | 0.88077100  | -0.29211200 |
| S | -1.01967600 | -0.75827000 | 0.33598400  |
| O | -1.12699400 | -2.14080100 | 0.02974300  |
| O | -1.54351200 | -0.19678100 | 1.53916800  |
| N | -1.79124600 | -0.00205800 | -0.98443200 |
| N | -2.12283700 | 1.16760500  | -0.78887800 |
| N | -2.46301000 | 2.22906800  | -0.70181800 |

**CBS-QB3**

Temperature= 298.150000                      Pressure= 1.000000  
 E(ZPE)= 0.112431                              E(Thermal)= 0.122849  
 E(SCF)= -940.791088                        DE(MP2)= -2.195954  
 DE(CBS)= -0.213777                         DE(MP34)= -0.021687  
 DE(CCSO)= -0.079143                       DE(Int)= 0.069843  
 DE(Empirical)= -0.094086  
 CBS-QB3 (0 K)= -943.213460              CBS-QB3 Energy= -943.203042  
 CBS-QB3 Enthalpy= -943.202098         CBS-QB3 Free Energy= -943.251272

|   |             |             |             |
|---|-------------|-------------|-------------|
| C | 2.47222900  | 1.27516600  | 0.69775600  |
| C | 1.15264400  | 0.86696400  | 0.87417000  |
| C | 0.68579200  | -0.22410300 | 0.14276100  |
| C | 1.50489500  | -0.91906800 | -0.74719100 |
| C | 2.81995600  | -0.49801200 | -0.91260300 |
| C | 3.30103500  | 0.59698800  | -0.19413800 |
| H | 2.85273300  | 2.11774600  | 1.26272600  |
| H | 0.49841800  | 1.36816600  | 1.57543400  |
| H | 1.11676000  | -1.77434100 | -1.28465900 |
| H | 3.47072000  | -1.02816000 | -1.59772600 |
| H | 4.32785600  | 0.91804500  | -0.32585800 |
| S | -0.99780400 | -0.75862500 | 0.36087400  |
| O | -1.08723500 | -2.16223800 | 0.08723700  |
| O | -1.53100300 | -0.15178400 | 1.55392000  |
| N | -1.79129500 | -0.03280200 | -1.01959700 |
| N | -2.23666200 | 1.10509100  | -0.80418100 |
| N | -2.68276300 | 2.13644300  | -0.70446400 |

**PhSO<sub>2</sub>N(<sup>1</sup>A)****B3LYP/6-311++G(3df,3pd)**

Zero-point correction= 0.102974  
 Thermal correction to Energy= 0.111319  
 Thermal correction to Enthalpy= 0.112263  
 Thermal correction to Gibbs Free Energy= 0.068966  
 Sum of electronic and zero-point Energies= -834.951446  
 Sum of electronic and thermal Energies= -834.943101  
 Sum of electronic and thermal Enthalpies= -834.942157  
 Sum of electronic and thermal Free Energies= -834.985455

|   |            |             |             |
|---|------------|-------------|-------------|
| C | 2.42287900 | 1.12716300  | 0.05487700  |
| C | 1.03766500 | 1.22785900  | 0.02756100  |
| C | 0.28280400 | 0.06057600  | -0.03273300 |
| C | 0.88009600 | -1.19831600 | -0.07468400 |
| C | 2.26301100 | -1.28116200 | -0.04212900 |



|   |             |             |             |
|---|-------------|-------------|-------------|
| C | 3.03242500  | -0.12158100 | 0.02155300  |
| H | 3.02316400  | 2.02490400  | 0.10189100  |
| H | 0.54437500  | 2.18755500  | 0.05316800  |
| H | 0.26449700  | -2.08348400 | -0.13750900 |
| H | 2.74179700  | -2.24986500 | -0.07187700 |
| H | 4.11126500  | -0.19390800 | 0.04208500  |
| S | -1.47626400 | 0.16187600  | -0.07194500 |
| O | -1.85331100 | 1.53978700  | -0.11099400 |
| O | -2.04806800 | -0.79327000 | 0.96971600  |
| N | -2.19530200 | -1.01922800 | -0.77615300 |

### M06-2X

|                                              |             |
|----------------------------------------------|-------------|
| Zero-point correction=                       | 0.104339    |
| Thermal correction to Energy=                | 0.112471    |
| Thermal correction to Enthalpy=              | 0.113415    |
| Thermal correction to Gibbs Free Energy=     | 0.070668    |
| Sum of electronic and zero-point Energies=   | -834.738206 |
| Sum of electronic and thermal Energies=      | -834.730073 |
| Sum of electronic and thermal Enthalpies=    | -834.729129 |
| Sum of electronic and thermal Free Energies= | -834.771876 |

|   |             |             |             |
|---|-------------|-------------|-------------|
| C | 2.41924100  | 1.12062200  | 0.04324900  |
| C | 1.03664000  | 1.23185700  | 0.01723900  |
| C | 0.28236200  | 0.06959100  | -0.03353700 |
| C | 0.86121300  | -1.19324400 | -0.06434600 |
| C | 2.24088600  | -1.28618600 | -0.03200300 |
| C | 3.01583400  | -0.13176100 | 0.02015200  |
| H | 3.02757200  | 2.01263300  | 0.08074300  |
| H | 0.54363700  | 2.19254400  | 0.03674200  |
| H | 0.22952700  | -2.06905800 | -0.11601800 |
| H | 2.71390300  | -2.25721200 | -0.05253800 |
| H | 4.09362100  | -0.21199600 | 0.04043700  |
| S | -1.46503900 | 0.17477000  | -0.07425100 |
| O | -1.84508600 | 1.54322300  | -0.06018700 |
| O | -2.02942900 | -0.83231200 | 0.91334100  |
| N | -2.18693800 | -1.00225400 | -0.76158500 |

### MPW1PW91

|                                            |             |
|--------------------------------------------|-------------|
| Zero-point correction=                     | 0.103970    |
| Thermal correction to Energy=              | 0.112231    |
| Thermal correction to Enthalpy=            | 0.113175    |
| Thermal correction to Gibbs Free Energy=   | 0.070077    |
| Sum of electronic and zero-point Energies= | -834.840961 |
| Sum of electronic and thermal Energies=    | -834.832701 |

Sum of electronic and thermal Enthalpies= -834.831756  
 Sum of electronic and thermal Free Energies= -834.874854

|   |             |             |             |
|---|-------------|-------------|-------------|
| C | 2.41334600  | 1.12204000  | 0.05686400  |
| C | 1.03230500  | 1.22672800  | 0.02823100  |
| C | 0.27818300  | 0.06401500  | -0.03395900 |
| C | 0.86801800  | -1.19376500 | -0.07743400 |
| C | 2.24672200  | -1.28062000 | -0.04300700 |
| C | 3.01662700  | -0.12573300 | 0.02290000  |
| H | 3.01704800  | 2.01740100  | 0.10534900  |
| H | 0.53810100  | 2.18644200  | 0.05458200  |
| H | 0.24496700  | -2.07413000 | -0.14354600 |
| H | 2.72337600  | -2.25034500 | -0.07359500 |
| H | 4.09529700  | -0.20125100 | 0.04473200  |
| S | -1.46536600 | 0.16643500  | -0.07468500 |
| O | -1.84238800 | 1.53682400  | -0.10801400 |
| O | -2.03567900 | -0.79699700 | 0.95036900  |
| N | -2.18280200 | -1.01938500 | -0.75042700 |

### CBS-QB3

Temperature= 298.150000      Pressure= 1.000000  
 E(ZPE)= 0.101463      E(Thermal)= 0.109968  
 E(SCF)= -831.783753      DE(MP2)= -1.789948  
 DE(CBS)= -0.177104      DE(MP34)= -0.037186  
 DE(CCSO)= -0.068376      DE(Int)= 0.058217  
 DE(Empirical)= -0.078322  
 CBS-QB3 (0 K)= -833.775009      CBS-QB3 Energy= -833.766503  
 CBS-QB3 Enthalpy= -833.765559      CBS-QB3 Free Energy= -833.809224

|   |             |             |             |
|---|-------------|-------------|-------------|
| C | 2.42781900  | 1.13070800  | 0.05591500  |
| C | 1.03934700  | 1.23170800  | 0.03065500  |
| C | 0.28434300  | 0.06096600  | -0.02914300 |
| C | 0.88122300  | -1.20108300 | -0.07556800 |
| C | 2.26758000  | -1.28373900 | -0.04498500 |
| C | 3.03834400  | -0.12126800 | 0.02008800  |
| H | 3.02992400  | 2.03012900  | 0.10327100  |
| H | 0.54302400  | 2.19251200  | 0.05758400  |
| H | 0.26257200  | -2.08659800 | -0.14096200 |
| H | 2.74802500  | -2.25421800 | -0.07773800 |
| H | 4.11964000  | -0.19367100 | 0.03918200  |
| S | -1.48362400 | 0.16065900  | -0.07088800 |
| O | -1.85730400 | 1.54620600  | -0.11831300 |
| O | -2.04689500 | -0.79651600 | 0.98736000  |
| N | -2.19479400 | -1.02285400 | -0.79161100 |

**PhSO<sub>2</sub>N(<sup>3</sup>A)****B3LYP/6-311++G(3df,3pd)**

|                                              |             |
|----------------------------------------------|-------------|
| Zero-point correction=                       | 0.102296    |
| Thermal correction to Energy=                | 0.110842    |
| Thermal correction to Enthalpy=              | 0.111786    |
| Thermal correction to Gibbs Free Energy=     | 0.067059    |
| Sum of electronic and zero-point Energies=   | -834.975107 |
| Sum of electronic and thermal Energies=      | -834.966562 |
| Sum of electronic and thermal Enthalpies=    | -834.965617 |
| Sum of electronic and thermal Free Energies= | -835.010344 |

|   |             |             |             |
|---|-------------|-------------|-------------|
| C | -2.31697100 | 1.20892700  | -0.00085700 |
| C | -0.93055500 | 1.21756300  | -0.02886300 |
| C | -0.24938800 | 0.00009700  | -0.04771400 |
| C | -0.93042900 | -1.21747500 | -0.02892700 |
| C | -2.31683100 | -1.20900400 | -0.00086800 |
| C | -3.00700900 | -0.00007000 | 0.01536100  |
| H | -2.85932500 | 2.14399800  | 0.00501400  |
| H | -0.37640200 | 2.14421100  | -0.05329700 |
| H | -0.37619800 | -2.14407100 | -0.05350900 |
| H | -2.85908700 | -2.14413100 | 0.00504200  |
| H | -4.08829200 | -0.00013200 | 0.03779300  |
| S | 1.51471900  | 0.00009500  | -0.06697200 |
| O | 1.99697100  | 1.25346300  | -0.58362700 |
| O | 1.99698000  | -1.25260000 | -0.58529400 |
| N | 1.83989800  | -0.00121900 | 1.57615600  |

**M06-2X**

|                                              |             |
|----------------------------------------------|-------------|
| Zero-point correction=                       | 0.103719    |
| Thermal correction to Energy=                | 0.112104    |
| Thermal correction to Enthalpy=              | 0.113048    |
| Thermal correction to Gibbs Free Energy=     | 0.068596    |
| Sum of electronic and zero-point Energies=   | -834.759664 |
| Sum of electronic and thermal Energies=      | -834.751279 |
| Sum of electronic and thermal Enthalpies=    | -834.750335 |
| Sum of electronic and thermal Free Energies= | -834.794787 |

|   |             |             |             |
|---|-------------|-------------|-------------|
| C | -2.30532200 | 1.20768800  | 0.00099300  |
| C | -0.92055900 | 1.21614400  | -0.03870500 |
| C | -0.24845000 | 0.00002900  | -0.06076500 |
| C | -0.92051900 | -1.21611400 | -0.03871300 |
| C | -2.30527800 | -1.20771000 | 0.00100100  |
| C | -2.99208300 | -0.00002100 | 0.02280300  |

|   |             |             |             |
|---|-------------|-------------|-------------|
| H | -2.84859900 | 2.14141800  | 0.01138200  |
| H | -0.35999200 | 2.13954300  | -0.06817500 |
| H | -0.35992500 | -2.13949600 | -0.06820800 |
| H | -2.84852300 | -2.14145900 | 0.01140100  |
| H | -4.07260400 | -0.00004100 | 0.05354400  |
| S | 1.50625900  | 0.00003100  | -0.07462300 |
| O | 1.98858800  | 1.24850100  | -0.57291100 |
| O | 1.98858600  | -1.24818400 | -0.57355400 |
| N | 1.81791000  | -0.00044300 | 1.58658100  |

### MPW1PW91

|                                              |             |
|----------------------------------------------|-------------|
| Zero-point correction=                       | 0.103259    |
| Thermal correction to Energy=                | 0.111737    |
| Thermal correction to Enthalpy=              | 0.112681    |
| Thermal correction to Gibbs Free Energy=     | 0.068095    |
| Sum of electronic and zero-point Energies=   | -834.866753 |
| Sum of electronic and thermal Energies=      | -834.858274 |
| Sum of electronic and thermal Enthalpies=    | -834.857330 |
| Sum of electronic and thermal Free Energies= | -834.901917 |

|   |             |             |             |
|---|-------------|-------------|-------------|
| C | -2.30445100 | 1.20610800  | -0.00020500 |
| C | -0.92160900 | 1.21461000  | -0.03172600 |
| C | -0.24486100 | 0.00002600  | -0.05145600 |
| C | -0.92158300 | -1.21458400 | -0.03202200 |
| C | -2.30442200 | -1.20612300 | -0.00048600 |
| C | -2.99176300 | -0.00001700 | 0.01775200  |
| H | -2.84732300 | 2.14090000  | 0.00680900  |
| H | -0.36412800 | 2.13968900  | -0.05833200 |
| H | -0.36408600 | -2.13964600 | -0.05887500 |
| H | -2.84727300 | -2.14092900 | 0.00631100  |
| H | -4.07308100 | -0.00003300 | 0.04252100  |
| S | 1.50555600  | 0.00003200  | -0.06906300 |
| O | 1.98591800  | 1.24794800  | -0.57767200 |
| O | 1.98592500  | -1.24755800 | -0.57847600 |
| N | 1.82348400  | -0.00053400 | 1.57208800  |

### CBS-QB3

|                            |                            |
|----------------------------|----------------------------|
| Temperature= 298.150000    | Pressure=1.000000          |
| E(ZPE)= 0.100955           | E(Thermal)= 0.109607       |
| E(SCF)= -831.871380        | DE(MP2)= -1.713471         |
| DE(CBS)= -0.172195         | DE(MP34)= -0.048023        |
| DE(CCSO)= -0.062913        | DE(Int)= 0.054860          |
| DE(Empirical)= -0.074271   |                            |
| CBS-QB3 (0 K)= -833.786438 | CBS-QB3 Energy=-833.777786 |

CBS-QB3 Enthalpy= -833.776842 CBS-QB3 Free Energy= -833.821752

|   |             |             |             |
|---|-------------|-------------|-------------|
| C | -2.32164300 | 1.21227100  | -0.00073400 |
| C | -0.93193800 | 1.22099100  | -0.02821100 |
| C | -0.25136800 | 0.00001800  | -0.04224400 |
| C | -0.93192100 | -1.22097100 | -0.02854100 |
| C | -2.32162400 | -1.21228000 | -0.00105400 |
| C | -3.01281600 | -0.00001100 | 0.01521700  |
| H | -2.86572800 | 2.14914900  | 0.00340200  |
| H | -0.37381100 | 2.14793000  | -0.05547400 |
| H | -0.37378500 | -2.14789800 | -0.05607100 |
| H | -2.86569700 | -2.14916700 | 0.00283300  |
| H | -4.09658000 | -0.00002300 | 0.03664200  |
| S | 1.52099900  | 0.00002600  | -0.06805800 |
| O | 1.99690400  | 1.26215700  | -0.58823400 |
| O | 1.99690900  | -1.26182500 | -0.58892100 |
| N | 1.84528200  | -0.00045100 | 1.58403500  |

### PhNSO<sub>2</sub>

#### B3LYP/6-311++G(3df,3pd)

|                                              |             |
|----------------------------------------------|-------------|
| Zero-point correction=                       | 0.104218    |
| Thermal correction to Energy=                | 0.112550    |
| Thermal correction to Enthalpy=              | 0.113495    |
| Thermal correction to Gibbs Free Energy=     | 0.069377    |
| Sum of electronic and zero-point Energies=   | -835.056309 |
| Sum of electronic and thermal Energies=      | -835.047976 |
| Sum of electronic and thermal Enthalpies=    | -835.047032 |
| Sum of electronic and thermal Free Energies= | -835.091150 |

|   |             |             |             |
|---|-------------|-------------|-------------|
| C | 2.30834700  | -1.32489200 | 0.00047100  |
| C | 0.95588700  | -1.01158100 | 0.00072400  |
| C | 0.56078300  | 0.32950100  | 0.00034400  |
| C | 1.52912200  | 1.33820100  | -0.00030800 |
| C | 2.87614800  | 1.01070100  | -0.00055400 |
| C | 3.27174100  | -0.32240500 | -0.00016100 |
| H | 2.60880400  | -2.36381700 | 0.00077500  |
| H | 0.21734500  | -1.79750000 | 0.00117000  |
| H | 1.20437700  | 2.36868200  | -0.00061100 |
| H | 3.61651600  | 1.79888400  | -0.00105800 |
| H | 4.32221400  | -0.57838300 | -0.00035300 |
| N | -0.77212900 | 0.80183300  | 0.00063300  |
| S | -2.04491500 | 0.00939700  | -0.00012100 |
| O | -2.09624300 | -1.42918800 | -0.00118200 |
| O | -3.26099200 | 0.76566300  | 0.00049200  |

**M06-2X**

|                                              |             |
|----------------------------------------------|-------------|
| Zero-point correction=                       | 0.105782    |
| Thermal correction to Energy=                | 0.113922    |
| Thermal correction to Enthalpy=              | 0.114866    |
| Thermal correction to Gibbs Free Energy=     | 0.071358    |
| Sum of electronic and zero-point Energies=   | -834.841927 |
| Sum of electronic and thermal Energies=      | -834.833787 |
| Sum of electronic and thermal Enthalpies=    | -834.832843 |
| Sum of electronic and thermal Free Energies= | -834.876351 |

|   |             |             |             |
|---|-------------|-------------|-------------|
| C | -2.28235000 | 1.31209300  | -0.15044700 |
| C | -0.93688100 | 0.98788200  | -0.23441200 |
| C | -0.54746600 | -0.34306000 | -0.10900300 |
| C | -1.50312800 | -1.33650300 | 0.08890500  |
| C | -2.84252400 | -0.99814200 | 0.17899300  |
| C | -3.23709300 | 0.32744800  | 0.05963900  |
| H | -2.58338000 | 2.34523200  | -0.25085100 |
| H | -0.20116300 | 1.76094300  | -0.39321200 |
| H | -1.17506600 | -2.36274700 | 0.16801500  |
| H | -3.57915300 | -1.77317800 | 0.33655500  |
| H | -4.28297400 | 0.59093200  | 0.12567500  |
| N | 0.78924700  | -0.80821200 | -0.21406300 |
| S | 2.01920700  | -0.00883000 | 0.02903500  |
| O | 2.00046700  | 1.37034000  | 0.39040600  |
| O | 3.26032500  | -0.67792900 | -0.13469900 |

**MPW1PW91**

|                                              |             |
|----------------------------------------------|-------------|
| Zero-point correction=                       | 0.105199    |
| Thermal correction to Energy=                | 0.113481    |
| Thermal correction to Enthalpy=              | 0.114425    |
| Thermal correction to Gibbs Free Energy=     | 0.070296    |
| Sum of electronic and zero-point Energies=   | -834.945071 |
| Sum of electronic and thermal Energies=      | -834.936789 |
| Sum of electronic and thermal Enthalpies=    | -834.935845 |
| Sum of electronic and thermal Free Energies= | -834.979974 |

|   |            |             |             |
|---|------------|-------------|-------------|
| C | 2.29452900 | 1.32190700  | -0.00036800 |
| C | 0.94619200 | 1.00688200  | -0.00065400 |
| C | 0.55532400 | -0.33104500 | -0.00029600 |
| C | 1.52210600 | -1.33517600 | 0.00033600  |
| C | 2.86506900 | -1.00635000 | 0.00062400  |
| C | 3.25726900 | 0.32397700  | 0.00028100  |
| H | 2.59287700 | 2.36147700  | -0.00065600 |

|   |             |             |             |
|---|-------------|-------------|-------------|
| H | 0.20518700  | 1.79104000  | -0.00114100 |
| H | 1.19750700  | -2.36590900 | 0.00056800  |
| H | 3.60664000  | -1.79339800 | 0.00111300  |
| H | 4.30726700  | 0.58194000  | 0.00050800  |
| N | -0.77114000 | -0.80119600 | -0.00069000 |
| S | -2.03409600 | -0.00963000 | -0.00037900 |
| O | -2.08049900 | 1.42015000  | 0.00116600  |
| O | -3.24561400 | -0.75688400 | 0.00020600  |

### CBS-QB3

|                   |             |                      |             |
|-------------------|-------------|----------------------|-------------|
| Temperature=      | 298.150000  | Pressure=            | 1.000000    |
| E(ZPE)=           | 0.102935    | E(Thermal)=          | 0.111355    |
| E(SCF)=           | -831.889103 | DE(MP2)=             | -1.796569   |
| DE(CBS)=          | -0.177509   | DE(MP34)=            | -0.024840   |
| DE(CCSO)=         | -0.066145   | DE(Int)=             | 0.058387    |
| DE(Empirical)=    | -0.078590   |                      |             |
| CBS-QB3 (0 K)=    | -833.871434 | CBS-QB3 Energy=      | -833.863014 |
| CBS-QB3 Enthalpy= | -833.862070 | CBS-QB3 Free Energy= | -833.906583 |

|   |             |             |             |
|---|-------------|-------------|-------------|
| C | 2.30874800  | 1.32769800  | -0.00039000 |
| C | 0.95349300  | 1.01309700  | -0.00058200 |
| C | 0.55844800  | -0.33187000 | -0.00020900 |
| C | 1.53082000  | -1.34153200 | 0.00033900  |
| C | 2.88038200  | -1.01266600 | 0.00053800  |
| C | 3.27520100  | 0.32390400  | 0.00017500  |
| H | 2.60892100  | 2.36924100  | -0.00068600 |
| H | 0.21310800  | 1.80039400  | -0.00099900 |
| H | 1.20361900  | -2.37362500 | 0.00059000  |
| H | 3.62313200  | -1.80189700 | 0.00096800  |
| H | 4.32775300  | 0.58173400  | 0.00032700  |
| N | -0.77431800 | -0.81671200 | -0.00047300 |
| S | -2.04658300 | -0.00819300 | -0.00003500 |
| O | -2.08499800 | 1.43873400  | 0.00079000  |
| O | -3.27169300 | -0.76367900 | -0.00023400 |

### PhN<sub>3</sub>

#### B3LYP/6-311++G(3df,3pd)

|                                            |             |
|--------------------------------------------|-------------|
| Zero-point correction=                     | 0.103241    |
| Thermal correction to Energy=              | 0.110215    |
| Thermal correction to Enthalpy=            | 0.111159    |
| Thermal correction to Gibbs Free Energy=   | 0.071337    |
| Sum of electronic and zero-point Energies= | -395.871569 |
| Sum of electronic and thermal Energies=    | -395.864595 |
| Sum of electronic and thermal Enthalpies=  | -395.863650 |

Sum of electronic and thermal Free Energies= -395.903473

|   |             |             |             |
|---|-------------|-------------|-------------|
| C | 2.20003300  | -0.88254400 | -0.00005800 |
| C | 0.87935600  | -1.30490600 | 0.00018100  |
| C | -0.14852200 | -0.36236900 | 0.00012800  |
| C | 0.15211100  | 1.00043000  | 0.00019400  |
| C | 1.47925500  | 1.40943100  | 0.00004100  |
| C | 2.50798200  | 0.47461100  | -0.00025700 |
| H | 2.99306400  | -1.61799600 | 0.00024200  |
| H | 0.62695700  | -2.35568700 | 0.00039300  |
| H | -0.64105800 | 1.73626800  | 0.00036200  |
| H | 1.70705200  | 2.46707600  | 0.00006400  |
| H | 3.53884700  | 0.79983100  | -0.00032900 |
| N | -1.46938000 | -0.87664600 | -0.00019500 |
| N | -2.41072900 | -0.08790600 | -0.00013600 |
| N | -3.35505500 | 0.53063500  | 0.00003100  |

### CBS-QB3

Temperature= 298.150000

Pressure= 1.000000

E(ZPE)= 0.102213

E(Thermal)= 0.109248

E(SCF)= -393.507379

DE(MP2)= -1.535630

DE(CBS)= -0.143410

DE(MP34)= -0.019269

DE(CCSO)= -0.062120

DE(Int)= 0.048376

DE(Empirical)= -0.064440

CBS-QB3 (0 K)= -395.181658

CBS-QB3 Energy= -395.174624

CBS-QB3 Enthalpy= -395.173680

CBS-QB3 Free Energy= -395.213618

|   |             |             |             |
|---|-------------|-------------|-------------|
| C | 2.20480300  | -0.88588600 | -0.00008900 |
| C | 0.88062300  | -1.30714700 | 0.00017100  |
| C | -0.14906600 | -0.36176300 | 0.00013300  |
| C | 0.15454700  | 1.00378500  | 0.00020700  |
| C | 1.48474900  | 1.41244400  | 0.00004100  |
| C | 2.51443000  | 0.47396700  | -0.00022800 |
| H | 2.99877800  | -1.62388500 | 0.00016100  |
| H | 0.62345100  | -2.35913400 | 0.00035000  |
| H | -0.63996000 | 1.74183300  | 0.00035900  |
| H | 1.71429700  | 2.47216800  | 0.00004000  |
| H | 3.54805300  | 0.79878000  | -0.00034800 |
| N | -1.47191100 | -0.87800600 | -0.00014900 |
| N | -2.41546700 | -0.08588600 | -0.00010100 |
| N | -3.36764000 | 0.52929700  | -0.00003200 |

### PhN

**B3LYP/6-311++G(3df,3pd)**



|                                              |             |
|----------------------------------------------|-------------|
| Zero-point correction=                       | 0.090890    |
| Thermal correction to Energy=                | 0.096199    |
| Thermal correction to Enthalpy=              | 0.097143    |
| Thermal correction to Gibbs Free Energy=     | 0.061045    |
| Sum of electronic and zero-point Energies=   | -286.312037 |
| Sum of electronic and thermal Energies=      | -286.306729 |
| Sum of electronic and thermal Enthalpies=    | -286.305784 |
| Sum of electronic and thermal Free Energies= | -286.341882 |

|   |             |             |             |
|---|-------------|-------------|-------------|
| C | 1.04125200  | -1.21181800 | 0.00000500  |
| C | -0.33546500 | -1.22870600 | 0.00000700  |
| C | -1.06904700 | -0.00000100 | -0.00004200 |
| C | -0.33546600 | 1.22870600  | 0.00000400  |
| C | 1.04125100  | 1.21181900  | 0.00000800  |
| C | 1.73913500  | 0.00000000  | -0.00001000 |
| H | 1.58734100  | -2.14592800 | 0.00001400  |
| H | -0.88819800 | -2.15736500 | 0.00002300  |
| H | -0.88820000 | 2.15736300  | 0.00002000  |
| H | 1.58734000  | 2.14592900  | 0.00001700  |
| H | 2.82044200  | 0.00000100  | -0.00000400 |
| N | -2.38695700 | 0.00000000  | 0.00001400  |

### CBS-QB3

|                               |                                  |
|-------------------------------|----------------------------------|
| Temperature= 298.150000       | Pressure= 1.000000               |
| E(ZPE)= 0.090036              | E(Thermal)= 0.095373             |
| E(SCF)= -284.628171           | DE(MP2)= -1.000896               |
| DE(CBS)= -0.100416            | DE(MP34)= -0.068360              |
| DE(CCSD)= -0.055711           | DE(Int)= 0.031764                |
| DE(Empirical)= -0.051399      |                                  |
| CBS-QB3 (0 K)= -285.783153    | CBS-QB3 Energy= -285.777816      |
| CBS-QB3 Enthalpy= -285.776872 | CBS-QB3 Free Energy= -285.813017 |

|   |             |             |             |
|---|-------------|-------------|-------------|
| C | 1.04420700  | -1.21438400 | 0.00000400  |
| C | -0.33597200 | -1.23059800 | 0.00000700  |
| C | -1.07166300 | -0.00000100 | -0.00004000 |
| C | -0.33597300 | 1.23059800  | 0.00000400  |
| C | 1.04420600  | 1.21438500  | 0.00000700  |
| C | 1.74370000  | 0.00000000  | -0.00000800 |
| H | 1.59128000  | -2.15085100 | 0.00001300  |
| H | -0.89078400 | -2.16088800 | 0.00002300  |
| H | -0.89078600 | 2.16088700  | 0.00002100  |
| H | 1.59127800  | 2.15085200  | 0.00001600  |
| H | 2.82756400  | 0.00000100  | -0.00000300 |

|   |             |            |            |
|---|-------------|------------|------------|
| N | -2.39422600 | 0.00000000 | 0.00001300 |
|---|-------------|------------|------------|

### Ph

#### B3LYP/6-311++G(3df,3pdd)

|                                              |  |  |             |
|----------------------------------------------|--|--|-------------|
| Zero-point correction=                       |  |  | 0.087139    |
| Thermal correction to Energy=                |  |  | 0.091514    |
| Thermal correction to Enthalpy=              |  |  | 0.092458    |
| Thermal correction to Gibbs Free Energy=     |  |  | 0.059106    |
| Sum of electronic and zero-point Energies=   |  |  | -231.552966 |
| Sum of electronic and thermal Energies=      |  |  | -231.548591 |
| Sum of electronic and thermal Enthalpies=    |  |  | -231.547647 |
| Sum of electronic and thermal Free Energies= |  |  | -231.580998 |

|   |             |             |             |
|---|-------------|-------------|-------------|
| C | -1.20879900 | -0.62960900 | -0.00000100 |
| C | -1.22145800 | 0.76939400  | 0.00000000  |
| C | 0.00000100  | 1.39088200  | 0.00000100  |
| C | 1.22145900  | 0.76939300  | -0.00000100 |
| C | 1.20879800  | -0.62961000 | 0.00000000  |
| C | -0.00000100 | -1.31914800 | 0.00000000  |
| H | -2.14535400 | -1.17268900 | -0.00000100 |
| H | -2.15317300 | 1.31910300  | 0.00000100  |
| H | 2.15317500  | 1.31910100  | 0.00000000  |
| H | 2.14535300  | -1.17269100 | 0.00000100  |
| H | -0.00000100 | -2.40064000 | 0.00000100  |

### CBS-QB3

|                               |                                  |
|-------------------------------|----------------------------------|
| Temperature= 298.150000       | Pressure= 1.000000               |
| E(ZPE)= 0.086138              | E(Thermal)= 0.090554             |
| E(SCF)= -230.132111           | DE(MP2)= -0.855797               |
| DE(CBS)= -0.082877            | DE(MP34)= -0.054500              |
| DE(CCSD)= -0.053278           | DE(Int)= 0.027317                |
| DE(Empirical)= -0.043195      |                                  |
| CBS-QB3 (0 K)= -231.108302    | CBS-QB3 Energy= -231.103886      |
| CBS-QB3 Enthalpy= -231.102942 | CBS-QB3 Free Energy= -231.136358 |

|   |             |             |            |
|---|-------------|-------------|------------|
| C | 0.63154500  | -1.21205500 | 0.00000000 |
| C | -0.77105200 | -1.22400800 | 0.00000000 |
| C | -1.39588400 | 0.00000000  | 0.00000000 |
| C | -0.77105200 | 1.22400800  | 0.00000000 |
| C | 0.63154500  | 1.21205500  | 0.00000000 |
| C | 1.32233900  | 0.00000000  | 0.00000000 |
| H | 1.17624500  | -2.15067900 | 0.00000000 |
| H | -1.32177800 | -2.15813400 | 0.00000000 |
| H | -1.32177700 | 2.15813400  | 0.00000000 |

|   |            |            |            |
|---|------------|------------|------------|
| H | 1.17624500 | 2.15067800 | 0.00000000 |
| H | 2.40642000 | 0.00000000 | 0.00000000 |

### SO<sub>2</sub>

#### B3LYP/6-311+G(3df)

|                                              |  |  |             |
|----------------------------------------------|--|--|-------------|
| Zero-point correction=                       |  |  | 0.007007    |
| Thermal correction to Energy=                |  |  | 0.010077    |
| Thermal correction to Enthalpy=              |  |  | 0.011021    |
| Thermal correction to Gibbs Free Energy=     |  |  | -0.017154   |
| Sum of electronic and zero-point Energies=   |  |  | -548.708946 |
| Sum of electronic and thermal Energies=      |  |  | -548.705877 |
| Sum of electronic and thermal Enthalpies=    |  |  | -548.704932 |
| Sum of electronic and thermal Free Energies= |  |  | -548.733107 |

|   |            |             |             |
|---|------------|-------------|-------------|
| S | 0.00000000 | 0.00000000  | 0.36335600  |
| O | 0.00000000 | 1.23915800  | -0.36335600 |
| O | 0.00000000 | -1.23915800 | -0.36335600 |

### CBS-QB3

|                               |                                  |
|-------------------------------|----------------------------------|
| Temperature= 298.150000       | Pressure= 1.000000               |
| E(ZPE)= 0.006796              | E(Thermal)= 0.009878             |
| E(SCF)= -547.289602           | DE(MP2)= -0.659534               |
| DE(CBS)= -0.069166            | DE(MP34)= -0.001836              |
| DE(CCSD)= -0.017073           | DE(Int)= 0.021826                |
| DE(Empirical)= -0.029068      |                                  |
| CBS-QB3 (0 K)= -548.037656    | CBS-QB3 Energy= -548.034573      |
| CBS-QB3 Enthalpy= -548.033629 | CBS-QB3 Free Energy= -548.061834 |

|   |            |             |             |
|---|------------|-------------|-------------|
| S | 0.00000000 | 0.00000000  | 0.36431600  |
| O | 0.00000000 | 1.24533100  | -0.36431600 |
| O | 0.00000000 | -1.24533100 | -0.36431600 |

### O<sub>2</sub>SN

#### B3LYP/6-311+G(3df)

|                                              |  |  |             |
|----------------------------------------------|--|--|-------------|
| Zero-point correction=                       |  |  | 0.011125    |
| Thermal correction to Energy=                |  |  | 0.014882    |
| Thermal correction to Enthalpy=              |  |  | 0.015827    |
| Thermal correction to Gibbs Free Energy=     |  |  | -0.016028   |
| Sum of electronic and zero-point Energies=   |  |  | -603.354202 |
| Sum of electronic and thermal Energies=      |  |  | -603.350444 |
| Sum of electronic and thermal Enthalpies=    |  |  | -603.349500 |
| Sum of electronic and thermal Free Energies= |  |  | -603.381355 |

|   |            |            |            |
|---|------------|------------|------------|
| S | 0.00000000 | 0.01322800 | 0.00000000 |
|---|------------|------------|------------|

|   |             |             |            |
|---|-------------|-------------|------------|
| O | 1.24900200  | -0.68288800 | 0.00000000 |
| O | -1.24893600 | -0.68300900 | 0.00000000 |
| N | -0.00007600 | 1.53079000  | 0.00000000 |

### CBS-QB3

|                               |                                  |
|-------------------------------|----------------------------------|
| Temperature= 298.150000       | Pressure= 1.000000               |
| E(ZPE)= 0.010787              | E(Thermal)= 0.014577             |
| E(SCF)= -601.652040           | DE(MP2)= -0.817506               |
| DE(CBS)= -0.086152            | DE(MP34)= -0.012450              |
| DE(CCSD)= -0.029827           | DE(Int)= 0.026580                |
| DE(Empirical)= -0.036372      |                                  |
| CBS-QB3 (0 K)= -602.596980    | CBS-QB3 Energy= -602.593190      |
| CBS-QB3 Enthalpy= -602.592246 | CBS-QB3 Free Energy= -602.624165 |

### TS1

#### B3LYP/6-311++G(3df,3pd)

|                                              |             |
|----------------------------------------------|-------------|
| Zero-point correction=                       | 0.107247    |
| Thermal correction to Energy=                | 0.118991    |
| Thermal correction to Enthalpy=              | 0.119935    |
| Thermal correction to Gibbs Free Energy=     | 0.067527    |
| Sum of electronic and zero-point Energies=   | -943.903807 |
| Sum of electronic and thermal Energies=      | -943.892062 |
| Sum of electronic and thermal Enthalpies=    | -943.891118 |
| Sum of electronic and thermal Free Energies= | -943.943526 |

|   |             |             |             |
|---|-------------|-------------|-------------|
| N | 2.08081900  | -0.02696300 | -0.83929900 |
| N | 2.58384900  | 1.56466800  | -0.08657500 |
| N | 3.30975800  | 2.42183900  | -0.10005300 |
| O | 1.14556300  | -1.98016400 | -1.05319100 |
| S | 0.89065700  | -0.88194200 | 0.20340500  |
| O | 1.20633500  | -1.20762900 | 1.77023300  |
| C | -0.84962300 | -0.21783300 | 0.06581100  |
| C | -1.42187100 | -0.15798600 | -1.20154800 |
| C | -1.49027900 | 0.18849100  | 1.23133800  |
| C | -2.72344200 | 0.34708900  | -1.29856400 |
| H | -0.87629500 | -0.50836000 | -2.06983200 |
| C | -2.79219400 | 0.69102800  | 1.11180900  |
| H | -0.99429200 | 0.09596200  | 2.19055600  |
| C | -3.40181100 | 0.77108400  | -0.14708400 |
| H | -3.20481700 | 0.40357400  | -2.26858600 |
| H | -3.32532500 | 1.01325800  | 1.99941400  |
| H | -4.41063900 | 1.16094100  | -0.23143700 |

### CBS-QB3

|                               |                                  |
|-------------------------------|----------------------------------|
| Temperature= 298.150000       | Pressure= 1.000000               |
| E(ZPE)= 0.108404              | E(Thermal)= 0.119500             |
| E(SCF)= -940.754768           | DE(MP2)= -2.151481               |
| DE(CBS)= -0.210339            | DE(MP34)= -0.045662              |
| DE(CCSO)= -0.080558           | DE(Int)= 0.069422                |
| DE(Empirical)= -0.094017      |                                  |
| CBS-QB3 (0 K)= -943.158999    | CBS-QB3 Energy= -943.147903      |
| CBS-QB3 Enthalpy= -943.146959 | CBS-QB3 Free Energy= -943.197773 |

|   |             |             |             |
|---|-------------|-------------|-------------|
| N | 0.00000000  | 0.00000000  | 0.00000000  |
| N | 0.00000000  | 0.00000000  | 1.89775100  |
| N | 0.56028700  | 0.00000000  | 2.84196000  |
| O | -0.95782100 | -0.24753800 | -1.87747900 |
| S | -1.50755800 | -0.23253000 | -0.50864000 |
| O | -2.26995700 | -1.33045500 | 0.02303700  |
| C | -2.48141000 | 1.24439700  | -0.30358700 |
| C | -1.99533600 | 2.44952700  | -0.81529900 |
| C | -3.70721500 | 1.17445700  | 0.35492700  |
| C | -2.75544500 | 3.60201400  | -0.65801800 |
| H | -1.04204800 | 2.47347800  | -1.32730900 |
| C | -4.45826200 | 2.33830100  | 0.50709400  |
| H | -4.06016300 | 0.22279000  | 0.72970500  |
| C | -3.98406000 | 3.54699500  | 0.00321700  |
| H | -2.39170300 | 4.54339500  | -1.05263000 |
| H | -5.41425800 | 2.29717900  | 1.01562800  |
| H | -4.57238200 | 4.44955500  | 0.12255500  |

## TS2

### B3LYP/6-311++G(3df,3pd)

|                                              |             |
|----------------------------------------------|-------------|
| Zero-point correction=                       | 0.109683    |
| Thermal correction to Energy=                | 0.120665    |
| Thermal correction to Enthalpy=              | 0.121609    |
| Thermal correction to Gibbs Free Energy=     | 0.071516    |
| Sum of electronic and zero-point Energies=   | -944.497829 |
| Sum of electronic and thermal Energies=      | -944.486847 |
| Sum of electronic and thermal Enthalpies=    | -944.485903 |
| Sum of electronic and thermal Free Energies= | -944.535996 |

|   |             |             |             |
|---|-------------|-------------|-------------|
| N | 0.00000000  | 0.00000000  | 0.00000000  |
| N | 0.00000000  | 0.00000000  | 1.83685700  |
| N | 0.54265700  | 0.00000000  | 2.78724400  |
| O | -2.27182900 | -1.22711400 | -0.25174100 |
| S | -1.54991400 | 0.00393300  | -0.45360300 |
| O | -2.26621500 | 1.23809900  | -0.25102300 |

|   |             |             |             |
|---|-------------|-------------|-------------|
| C | -0.68293500 | 0.00184600  | -2.03482500 |
| C | -0.40942500 | -1.21982300 | -2.65848100 |
| C | -0.40144800 | 1.22184600  | -2.65820900 |
| C | 0.12954000  | -1.21311200 | -3.93348100 |
| H | -0.63611400 | -2.14140900 | -2.14324500 |
| C | 0.13751100  | 1.21186900  | -3.93321000 |
| H | -0.62193900 | 2.14481500  | -2.14277500 |
| C | 0.40259100  | -0.00140300 | -4.56614800 |
| H | 0.34030400  | -2.14693300 | -4.43543200 |
| H | 0.35454400  | 2.14439800  | -4.43489000 |
| H | 0.82667800  | -0.00268700 | -5.56129700 |

### CBS-QB3

|                   |             |                      |             |
|-------------------|-------------|----------------------|-------------|
| Temperature=      | 298.150000  | Pressure=            | 1.000000    |
| E(ZPE)=           | 0.108225    | E(Thermal)=          | 0.119341    |
| E(SCF)=           | -940.747174 | DE(MP2)=             | -2.159818   |
| DE(CBS)=          | -0.210718   | DE(MP34)=            | -0.038708   |
| DE(CCSD)=         | -0.080835   | DE(Int)=             | 0.069428    |
| DE(Empirical)=    | -0.093927   |                      |             |
| CBS-QB3 (0 K)=    | -943.153527 | CBS-QB3 Energy=      | -943.142412 |
| CBS-QB3 Enthalpy= | -943.141468 | CBS-QB3 Free Energy= | -943.191879 |

### TS3

#### B3LYP/6-311++G(3df,3pd)

|                                              |             |
|----------------------------------------------|-------------|
| Zero-point correction=                       | 0.099503    |
| Thermal correction to Energy=                | 0.108241    |
| Thermal correction to Enthalpy=              | 0.109185    |
| Thermal correction to Gibbs Free Energy=     | 0.064862    |
| Sum of electronic and zero-point Energies=   | -834.408159 |
| Sum of electronic and thermal Energies=      | -834.399421 |
| Sum of electronic and thermal Enthalpies=    | -834.398477 |
| Sum of electronic and thermal Free Energies= | -834.442800 |

|   |             |             |             |
|---|-------------|-------------|-------------|
| S | 1.56905400  | 0.06670300  | -0.00886700 |
| O | 2.32884200  | -1.01966600 | -1.01333600 |
| O | 2.00423900  | 1.64184700  | -0.08541000 |
| N | 1.56310300  | -0.84194400 | 1.53459300  |
| C | -0.30357400 | 0.02226400  | -0.02879500 |
| C | -0.94198700 | -1.22282500 | -0.07585800 |
| C | -0.98282100 | 1.24197600  | 0.01076600  |
| C | -2.33990800 | -1.23532100 | -0.09658900 |
| H | -0.36226800 | -2.13744700 | -0.09495700 |
| C | -2.37794000 | 1.20638000  | -0.00912500 |
| H | -0.42076600 | 2.16832600  | 0.04158400  |

|   |             |             |             |
|---|-------------|-------------|-------------|
| C | -3.05087800 | -0.02750000 | -0.06039900 |
| H | -2.86913800 | -2.18046600 | -0.13676400 |
| H | -2.94087700 | 2.13277400  | 0.01043000  |
| H | -4.13554300 | -0.04412500 | -0.07059600 |

### CBS-QB3

#### TS4

##### B3LYP/6-311++G(3df,3pd)

|                                              |  |          |             |
|----------------------------------------------|--|----------|-------------|
| Zero-point correction=                       |  |          | 0.099705    |
| Thermal correction to Energy=                |  |          | 0.108007    |
| Thermal correction to Enthalpy=              |  |          | 0.108951    |
| Thermal correction to Gibbs Free Energy=     |  | 0.065191 |             |
| Sum of electronic and zero-point Energies=   |  |          | -834.706495 |
| Sum of electronic and thermal Energies=      |  |          | -834.698193 |
| Sum of electronic and thermal Enthalpies=    |  |          | -834.697249 |
| Sum of electronic and thermal Free Energies= |  |          | -834.741009 |

|   |             |             |             |
|---|-------------|-------------|-------------|
| S | 0.00000000  | 0.00000000  | 0.00000000  |
| O | 0.00000000  | 0.00000000  | 1.46756600  |
| O | 1.23684700  | 0.00000000  | -0.78994700 |
| N | -1.17855100 | -1.01349000 | -0.64566200 |
| C | -1.49694500 | 0.67023100  | -0.81892100 |
| C | -2.58325500 | 1.14723200  | 0.00459600  |
| C | -1.39010500 | 1.14849600  | -2.17742200 |
| C | -3.49074000 | 2.04287900  | -0.51987200 |
| H | -2.65628500 | 0.79710600  | 1.02818800  |
| C | -2.32145600 | 2.04438500  | -2.65774800 |
| H | -0.56765200 | 0.79922600  | -2.79165500 |
| C | -3.37946400 | 2.49901600  | -1.84745400 |
| H | -4.30076500 | 2.40360500  | 0.10783900  |
| H | -2.23004000 | 2.40604000  | -3.67809200 |
| H | -4.10392100 | 3.20343100  | -2.24314800 |

### CBS-QB3

|                          |                      |
|--------------------------|----------------------|
| Temperature= 298.150000  | Pressure= 1.000000   |
| E(ZPE)= 0.098276         | E(Thermal)= 0.106595 |
| E(SCF)= -831.808495      | DE(MP2)= -1.699034   |
| DE(CBS)= -0.174645       | DE(MP34)= -0.064835  |
| DE(CCSD)= -0.076364      | DE(Int)= 0.054065    |
| DE(Empirical)= -0.079299 |                      |

CBS-QB3 (0 K)= -833.750329

CBS-QB3 Energy= -833.742011

CBS-QB3 Enthalpy= -833.741067

CBS-QB3 Free Energy= -833.784822

|   |             |             |             |
|---|-------------|-------------|-------------|
| S | 0.00000000  | 0.00000000  | 0.00000000  |
| O | 0.00000000  | 0.00000000  | 1.44581600  |
| O | 1.22040600  | 0.00000000  | -0.77515500 |
| N | -1.15714400 | -1.00782300 | -0.63612700 |
| C | -1.50679400 | 0.63124400  | -0.82638400 |
| C | -2.59770000 | 1.10697600  | -0.00698600 |
| C | -1.40333700 | 1.10979700  | -2.18578800 |
| C | -3.48893600 | 2.01691800  | -0.52444400 |
| H | -2.68238300 | 0.74463800  | 1.00886400  |
| C | -2.31969700 | 2.01983400  | -2.65714600 |
| H | -0.59232300 | 0.74928600  | -2.80443500 |
| C | -3.36884600 | 2.48477100  | -1.84480100 |
| H | -4.29621400 | 2.37834800  | 0.10233400  |
| H | -2.22578600 | 2.38326200  | -3.67412400 |
| H | -4.08190900 | 3.20008500  | -2.23464100 |
